# Supplementary material for: Application of LTA zeolite-modified electrode for sensitive detection of retinoic acid in tap water
Source: Royal Society of Chemistry journal article supplement (doi:10.1039/d2ra06011f), 2023-01-01
Supplement: d2ra06011f1.pdf [file d2ra06011f1.pdf]

Supporting information

## **Application of LTA zeolite-modified electrode for sensitive detection of retinoic acid in tap water**

Yuying Jiang,<sup>a</sup> Xiyuan Tong,<sup>#a</sup> YifengE,<sup>\*a</sup> Pengyan Wei,<sup>a</sup> Jia Wang,<sup>a</sup> Peng Chen,<sup>\*b</sup> Lei Wang,  
<sup>\*c</sup> Thomas F. Krenzel,<sup>d</sup> and Kun Qian<sup>\*a</sup>

a. College of Pharmacy, Jinzhou Medical University, Jinzhou, Liaoning, P. R. China.

b. Key Laboratory of Functional Inorganic Material Chemistry, School of Chemistry and Materials Science, Heilongjiang University, Harbin, Heilongjiang, P. R. China.

c. Changchun Institute of Applied Chemistry, Chinese Academy of Science, Changchun 130022, P. R. China

d. Materials Engineering, Faculty Technology and Bionics, Rhine-Waal University of Applied Sciences, D-47533, Kleve, Germany

**Table**

**Table S1.** Comparison of different electrochemical methods for determination of RA.

**Table S1.**

Comparison of different electrochemical methods for determination of RA.

| Electrodes                      | Detection method | Linear range ( $\mu\text{M}$ ) | LOD ( $\mu\text{M}$ ) | Ref       |
|---------------------------------|------------------|--------------------------------|-----------------------|-----------|
| thin-film lead deposited GCE    | DPV              | --                             | --                    | 1         |
| RA-loaded SLN <sup>a</sup> /GCE | DPV              | 9.71-45.5                      | 1.56                  | 2         |
| GCE                             | ASV <sup>b</sup> | 1-10                           | 0.0075                | 3         |
| LTA zeolite/GCE                 | DPV              | 0.8-20.1                       | 0.8                   | This work |

<sup>a</sup>SLN, solid lipid nanoparticles; <sup>b</sup>ASV, anodic stripping voltammetry.

## Figure captions

**Fig. S1.** Comparison of XRD spectra between synthesized LTA zeolite and standard LTA zeolite.

**Fig. S2.** DPV diagrams of LTA zeolite calcined at different temperatures respectively (150, 300, 450, 600, 750, and 900 °C) with 10  $\mu$ M RA.

**Fig. S3. A** The simulated linear regression equation based on the relationship between current peaks (with error bar) and the RA concentration in the mixture of 5mL PBS and 5mL tap water; **B** Point line diagram based on the peak current (with A i-t C method) while the RA concentration set as 0, 2.0, 3.8, 5.7, 7.4, 9.1, 10.7, 12.3  $\mu$ M. For each concentration, the stable operation time was running for 400 s to record the current peak.

**Fig. S4.** CV curve of the LTA/GCE electrode cycle scanning 100 segments in 1 mM  $K_3Fe(CN)_6$  and 0.1 M KCl solution, the scan rate was 100  $mV s^{-1}$ .

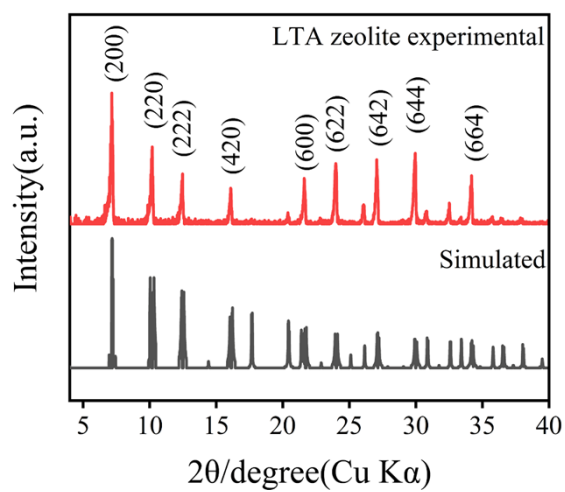

**Fig. S1.** Comparison of XRD spectra between synthesized LTA zeolite and standard LTA zeolite.

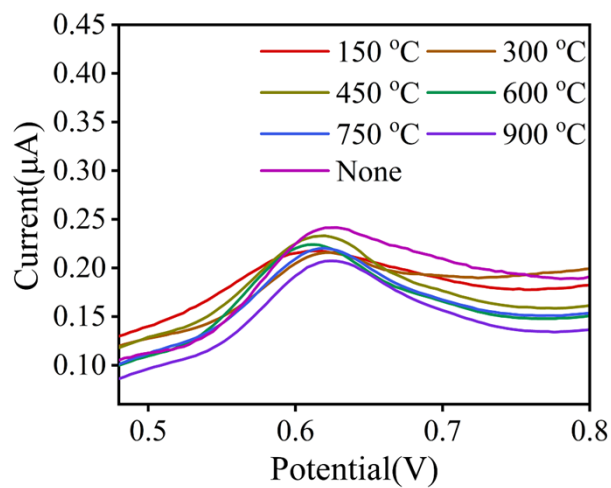

**Fig. S2.** DPV diagrams of LTA zeolite calcined at different temperatures respectively (150, 300, 450, 600, 750, and 900 °C) with 10 μM RA.

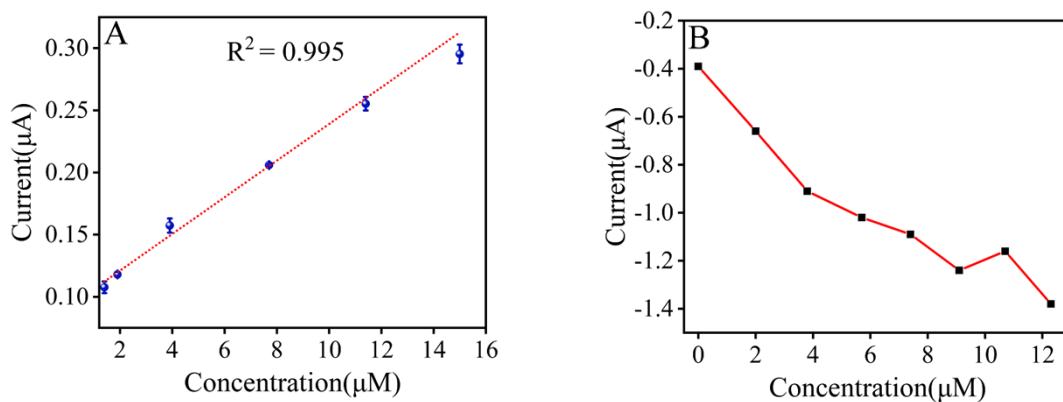

**Fig. S3.** **A** The simulated linear regression equation based on the relationship between current peaks (with error bar) and the RA concentration in the mixture of 5mL PBS and 5mL tap water; **B** Point line diagram based on the peak current (with A i-t C method) while the RA concentration set as 0, 2.0, 3.8, 5.7, 7.4, 9.1, 10.7, 12.3  $\mu\text{M}$ . For each concentration, the stable operation time was running for 400 s to record the current peak.

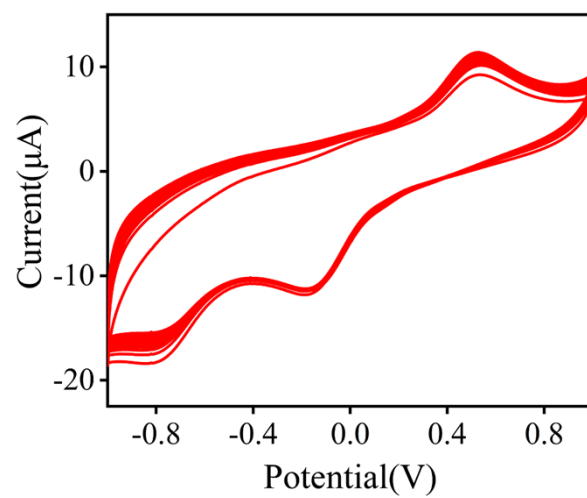

**Fig. S4.** CV curve of the LTA/GCE electrode cycle scanning 100 segments in 1 mM  $\text{K}_3\text{Fe}(\text{CN})_6$  and 0.1 M KCl solution, the scan rate was  $100 \text{ mV s}^{-1}$ .



## References

- 1 L.-H. Wang, *Anal. Chim. Acta*, 2000, 415, 193-200.
- 2 F. L. O. da Silva, L. M. da Silva Tinoco, L. A. M. Ferreira, A. R. Malagutti and G. Carneiro, *Anal. Chim. Acta*, 2015, 182, 929-934.
- 3 A. F. Alghamdi, *J. King Saud Univ. Sci.*, 2020, 32, 2635-2640.
